# Supplementary material
Source: PubMed Central journal article supplement (PMC9582047)
Supplement: NIHMS1799277-supplement-Supplementary_Materials__figures__tables.pdf [file NIHMS1799277-supplement-Supplementary_Materials__figures__tables.pdf]

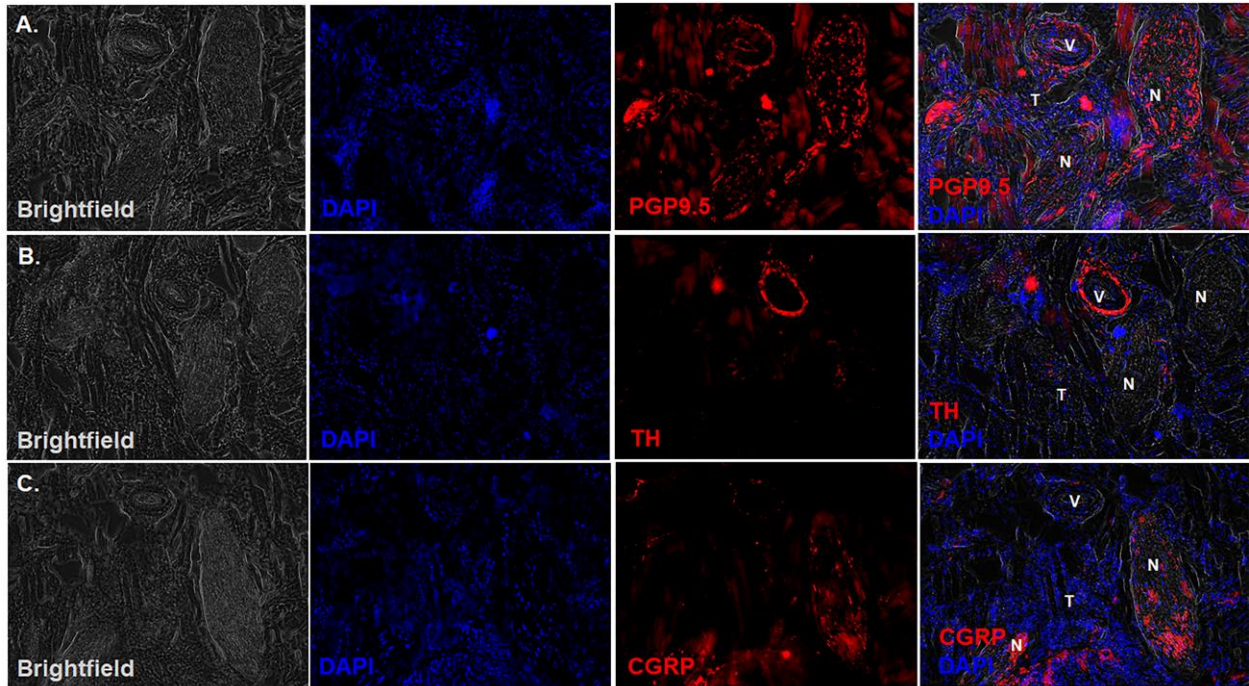

**Supplemental Figure 1: Anatomical relationship between intratumoral sensory and sympathetic nerve fibers.** Representative images from immunohistological staining of serial 20 $\mu$ m coronal tongue tumor sections with (A) PGP9.5, (B) TH, and (C) CGRP. DAPI was used to label the nuclei within the tumor. Nerve (N), Vasculature (V), and Tumor (T) are indicated in the merged image (right column) for each marker used. TH, tyrosine hydroxylase; CGRP, calcitonin-gene related peptide. Image magnification = 20x.

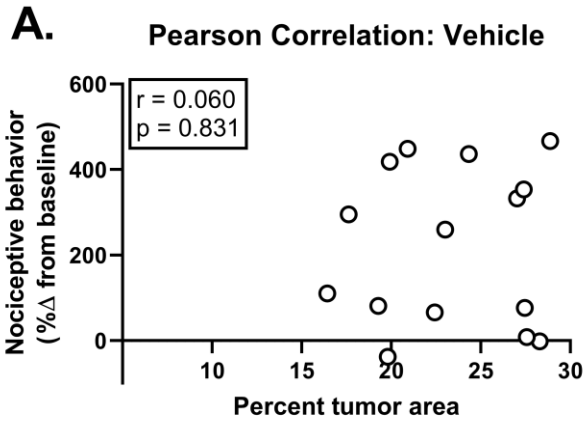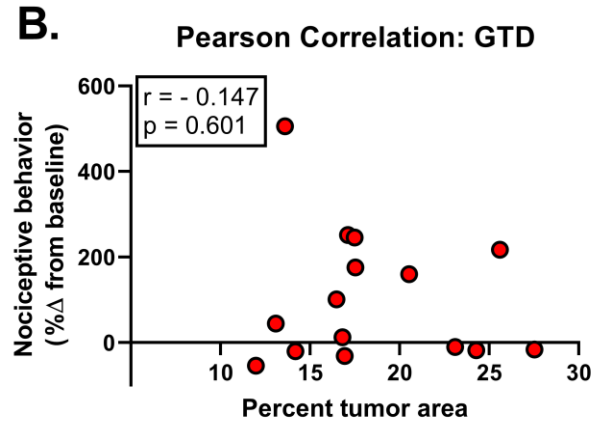

**Supplemental Figure 2: Correlation between tumor size and gnaw-time.** The relationship between the tumor size in the tongue expressed as percent tumor area and measured nociceptive behavior expressed as a percent change from baseline gnaw-time in tumor-bearing mice treated with **(A)** vehicle (saline,  $n=15$ ,  $p>0.05$ ) and **(B)** GTD (0.5mg/mouse,  $n=15$ ,  $p>0.05$ ) was evaluated with Pearson correlation. Note treatment groups could not be pooled given that treatment had a significant effect on both dependent variables.

**Supplemental Table 1.** HNSCC Demographic and Clinical Characteristics.

| <b>Variables</b> | <b>M±SD</b> | <b>n(%)</b> |
|------------------|-------------|-------------|
| Age, years       | 59.38±6.95  |             |
| Sex              |             |             |
| Male             |             | 10(79.92)   |
| Female           |             | 3(23.08)    |
| Race             |             |             |
| White            |             | 11(84.62)   |
| Other            |             | 2(15.38)    |
| Radiation        |             |             |
| No               |             | 2(15.38)    |
| Yes              |             | 11(84.62)   |
| Chemotherapy     |             |             |
| No               |             | 6(46.15)    |
| Yes              |             | 7(53.85)    |
| Immunotherapy    |             |             |
| No               |             | 12(90.91)   |
| Yes              |             | 1(7.69)     |
| Nodal Stage      |             |             |
| N0               |             | 1(7.69)     |
| N1               |             | 4(30.77)    |
| N2               |             | 8(61.54)    |
| Tumor Stage      |             |             |
| T1               |             | 1(7.69)     |
| T2               |             | 7(53.85)    |
| T3               |             | 2(15.38)    |
| T4               |             | 3(23.08)    |
| Metastasis       |             |             |
| M0               |             | 1(7.69)     |
| MX               |             | 12(90.91)   |
| Site             |             |             |
| Oropharynx       |             | 5(38.46)    |
| HPV              |             |             |
| Neg              |             | 0(0)        |
| Pos              |             | 5(100)      |
| Oral cavity      |             | 8(61.54)    |
| Smoking          |             |             |
| No               |             | 5(38.46)    |
| Yes              |             | 8(61.54)    |
| Alcohol          |             |             |
| No               |             | 4(30.77)    |
| Yes              |             | 9(69.23)    |
| PNI              |             |             |
| No               |             | 0(0)        |

|               |  |            |
|---------------|--|------------|
| Yes           |  | 13(100.00) |
| ECS           |  |            |
| No            |  | 8(61.54)   |
| Yes           |  | 4(30.77)   |
| Not Evaluated |  | 1(7.69)    |

Mean±Standard deviation (M±SD), Human Papillomavirus (HPV), Perineural invasion (PNI), Extracapsular spread (ECS),
